# Supplementary material
Source: PubMed Central journal article supplement (PMC3426119)
Supplement: supp_tpc.112.097741_tpc097741Supplemental.pdf [file supp_tpc.112.097741_tpc097741Supplemental.pdf]

Figure S1 (Hong)

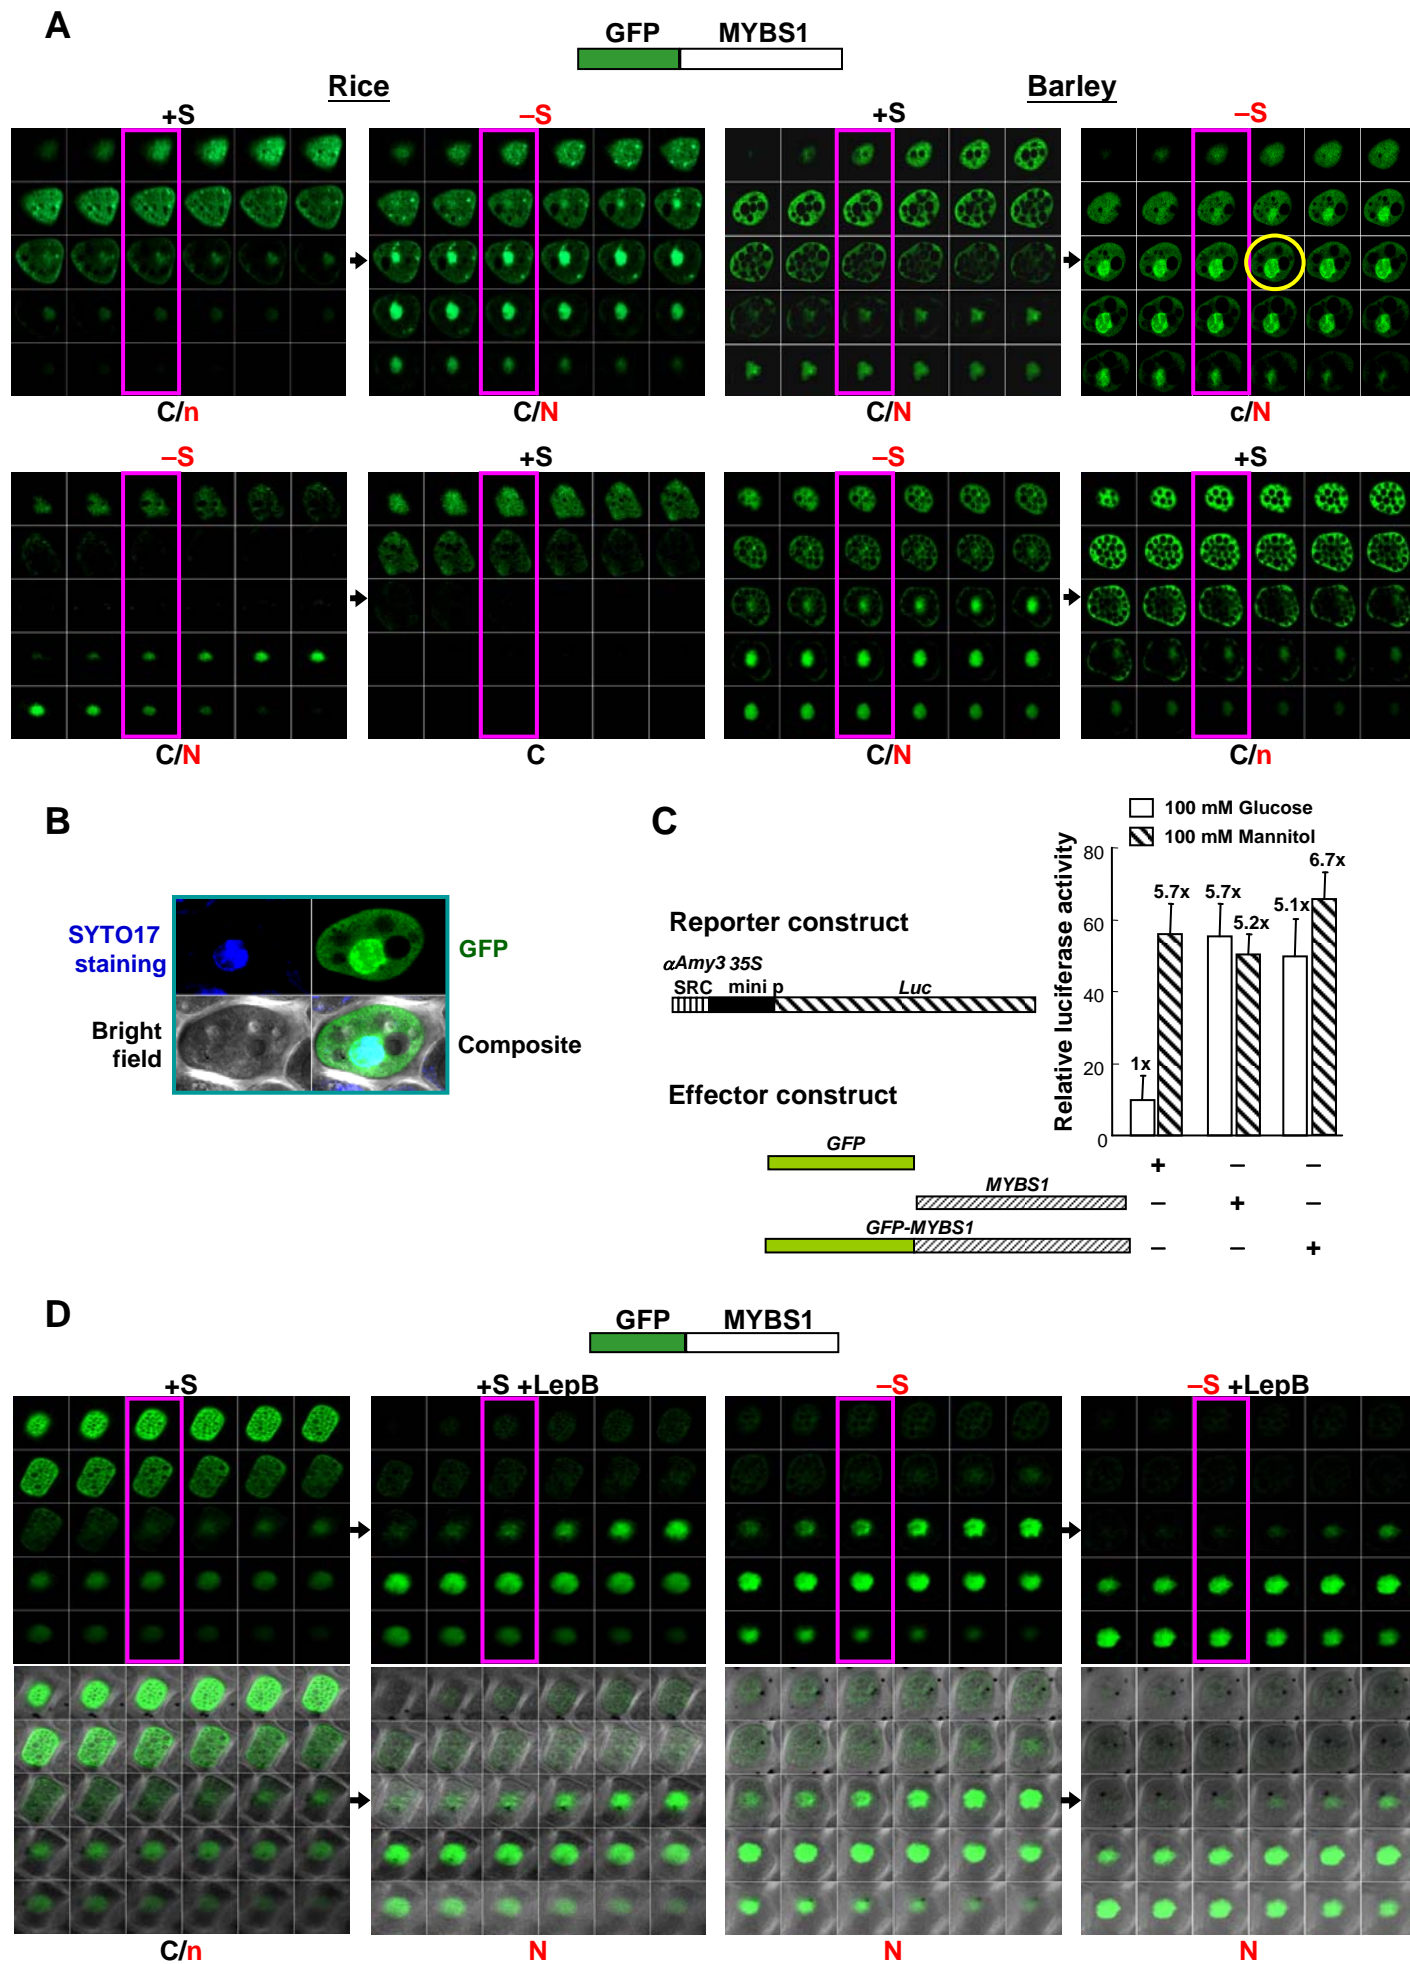

**Supplemental Figure 1.** Glucose Regulates the Nucleocytoplasmic Shuttling of MYBS1, Related to Figures 1A and 1C.

**(A)** Glucose inhibits the nuclear localization of MYBS1. Rice and barley aleurones were transfected with *Ubi:GFP-OsMYBS1*, incubated in +S or –S medium for 24 h, and then switched from +S to –S medium or from –S to +S medium and incubated for another 24 h. Boxes indicate images shown in Figure 1A. C and N indicate higher and c and n indicate lower GFP signals in the cytoplasm and nucleus, respectively.

**(B)** Accumulation of GFP-MYBS1 in nuclei was confirmed by staining with the red fluorescent dye SYTO17 that specifically stains nuclei. Rice aleurones were transfected with *Ubi:GFP-OsMYBS1* and incubated in -S medium containing SYTO17 for 24 h. The circled cell in (A) was examined for localization of the nucleus and GFP signal.

**(C)** The GFP-MYBS1 fusion protein was as active as MYBS1. *Ubi:GFP*, *Ubi:OsMYBS1*, or *Ubi:GFP-OsMYBS1* served as the effector and  $\alpha$ .*Amy3 SRC-CaMV35S:Luc* served as a reporter. Rice embryos were co-transfected with effector and reporter, and incubated with glucose or mannitol for 24 h. Subsequently, luciferase activity was assayed. The luciferase activity in rice aleurones transfected with reporter constructs and *Ubi:GFP* was set as 1X, and other values were calculated relative to this value. Error bars indicate the SE for three replicate experiments

**(D)** MYBS1 accumulated exclusively in the nucleus in both +S and –S medium in the presence of LepB. Rice aleurones were transfected with *Ubi:GFP-OsMYBS1* and incubated in +S or –S medium for 24 h. After addition of LepB, aleurones were incubated for another 24 h. Boxes indicate images shown in Figure 1C. C and N indicate higher and c and n indicate lower GFP signals in the cytoplasm and nucleus, respectively.

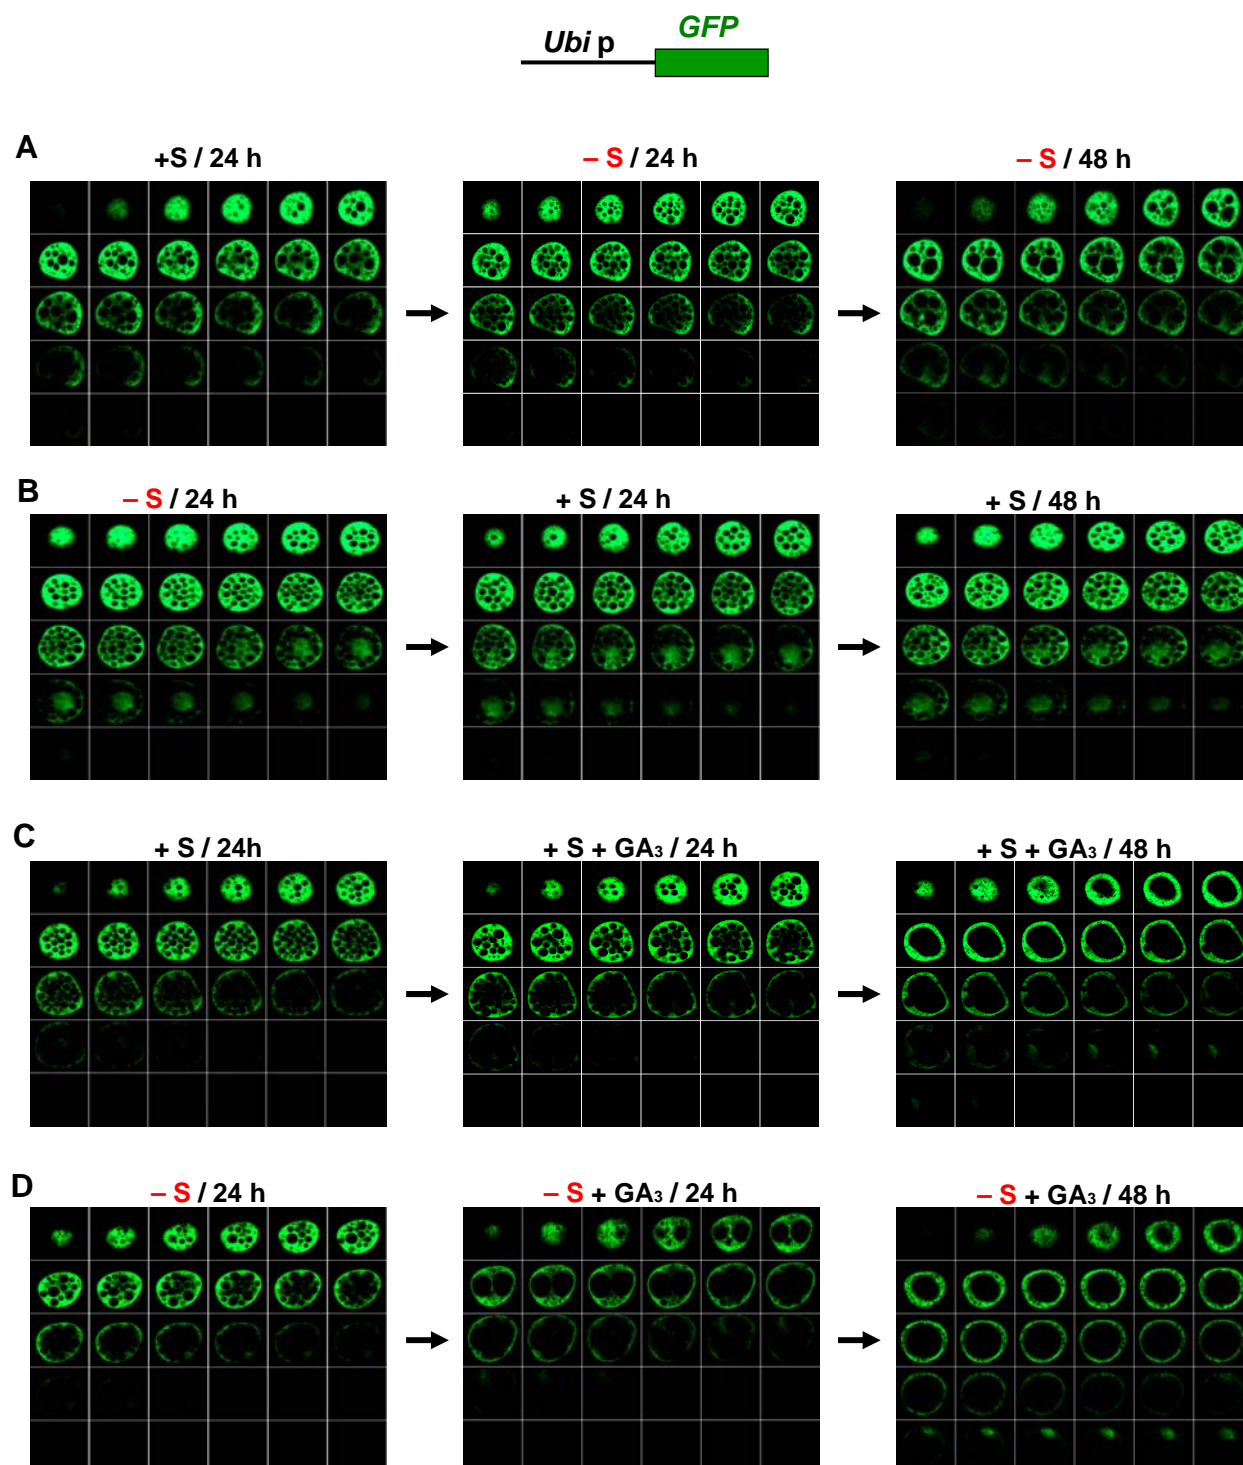

**Supplemental Figure 2.** GFP without MYBS1 Was Distributed In Both the Cytoplasm and the Nucleus of Aleurone Cells Regardless of the Medium (+S or -S) or the Presence or Absence of GA<sub>3</sub>, Related to Figures 1A and 3A.

As negative controls of Figures 1A/Supplemental Figure 1A and Figures 3A/Supplemental Figure 5A, rice aleurones were transfected with *Ubi:GFP* and incubated in:

(A) +S medium for 24 h, and then switched to -S medium for another 24 and 48 h.

(B) -S medium for 24 h, and then switched to +S medium for another 24 and 48 h.

(C) +S medium for 24 h, followed by incubation for another 24 and 48 h after addition of GA<sub>3</sub>.

(D) -S medium for 24 h, followed by incubation for another 24 and 48 h after addition of GA<sub>3</sub>.

GA<sub>3</sub>-induced severe vacuolation was observed in (C) and (D).

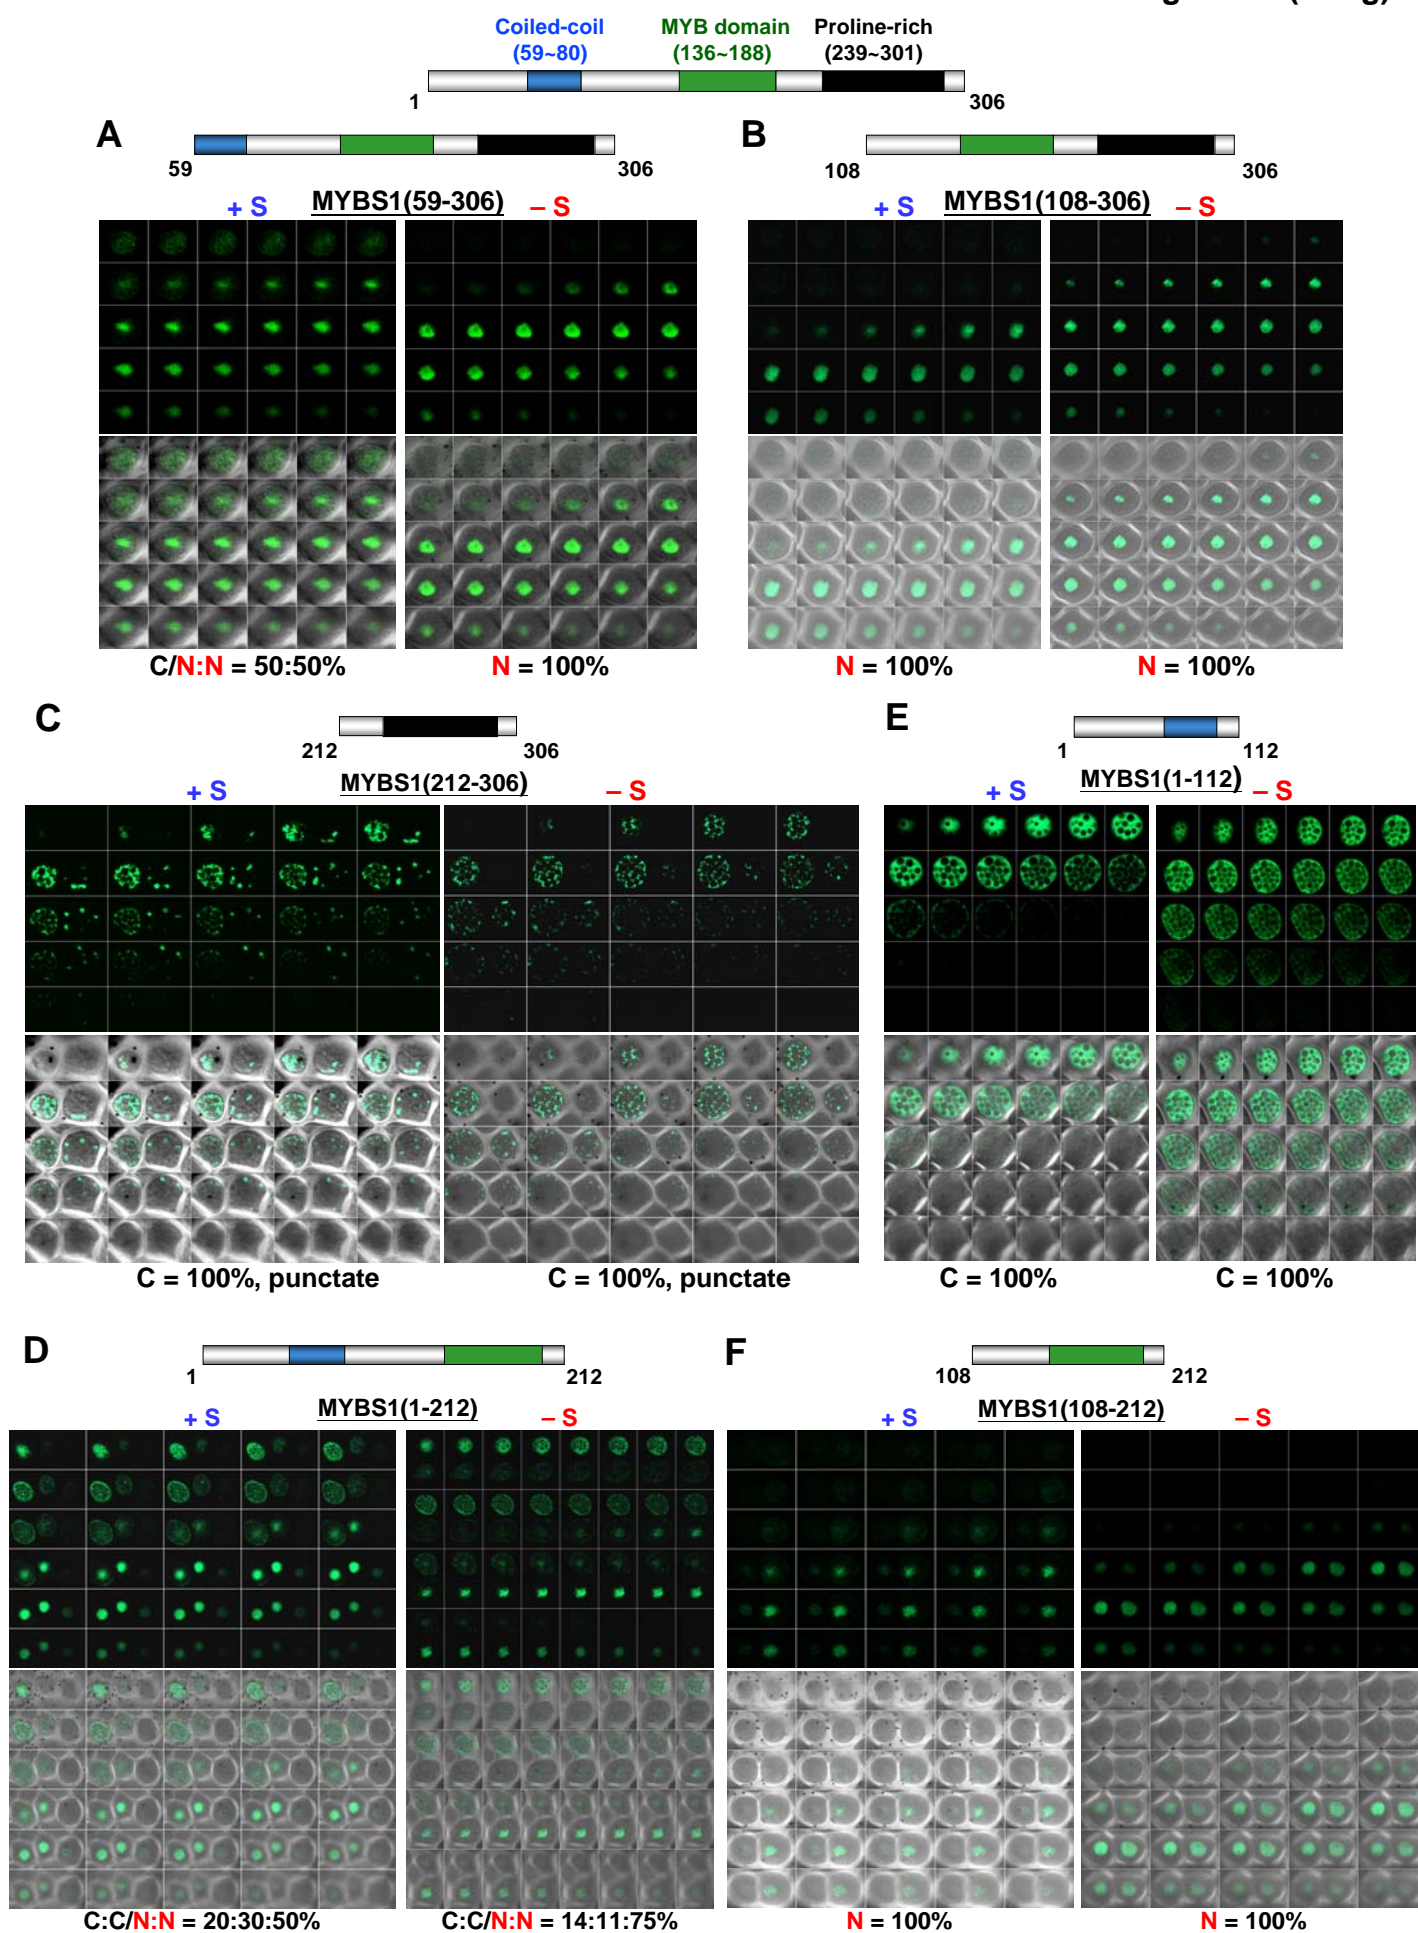

**Supplemental Figure 3.** OsMYBS1(108-212) Contains a Nuclear Localization Signal (NLS), and OsMYBS1(1-112) Contains a Cytoplasmic Retention Signals (CRS), Related to Figure 2A.

Barley aleurones were transfected with plasmids containing *GFP*-fused with **(A)** OsMYBS1(59-306), **(B)** OsMYBS1(108-306), **(C)** OsMYBS1(212-306), **(D)** OsMYBS1(1-212), **(E)** OsMYBS1(1-112), or **(F)** OsMYBS1(108-212), and incubated in +S or –S medium for 24 h. Percentage (%) = cells in the cytoplasm (C) or nucleus (N) per total cells expressing GFP examine

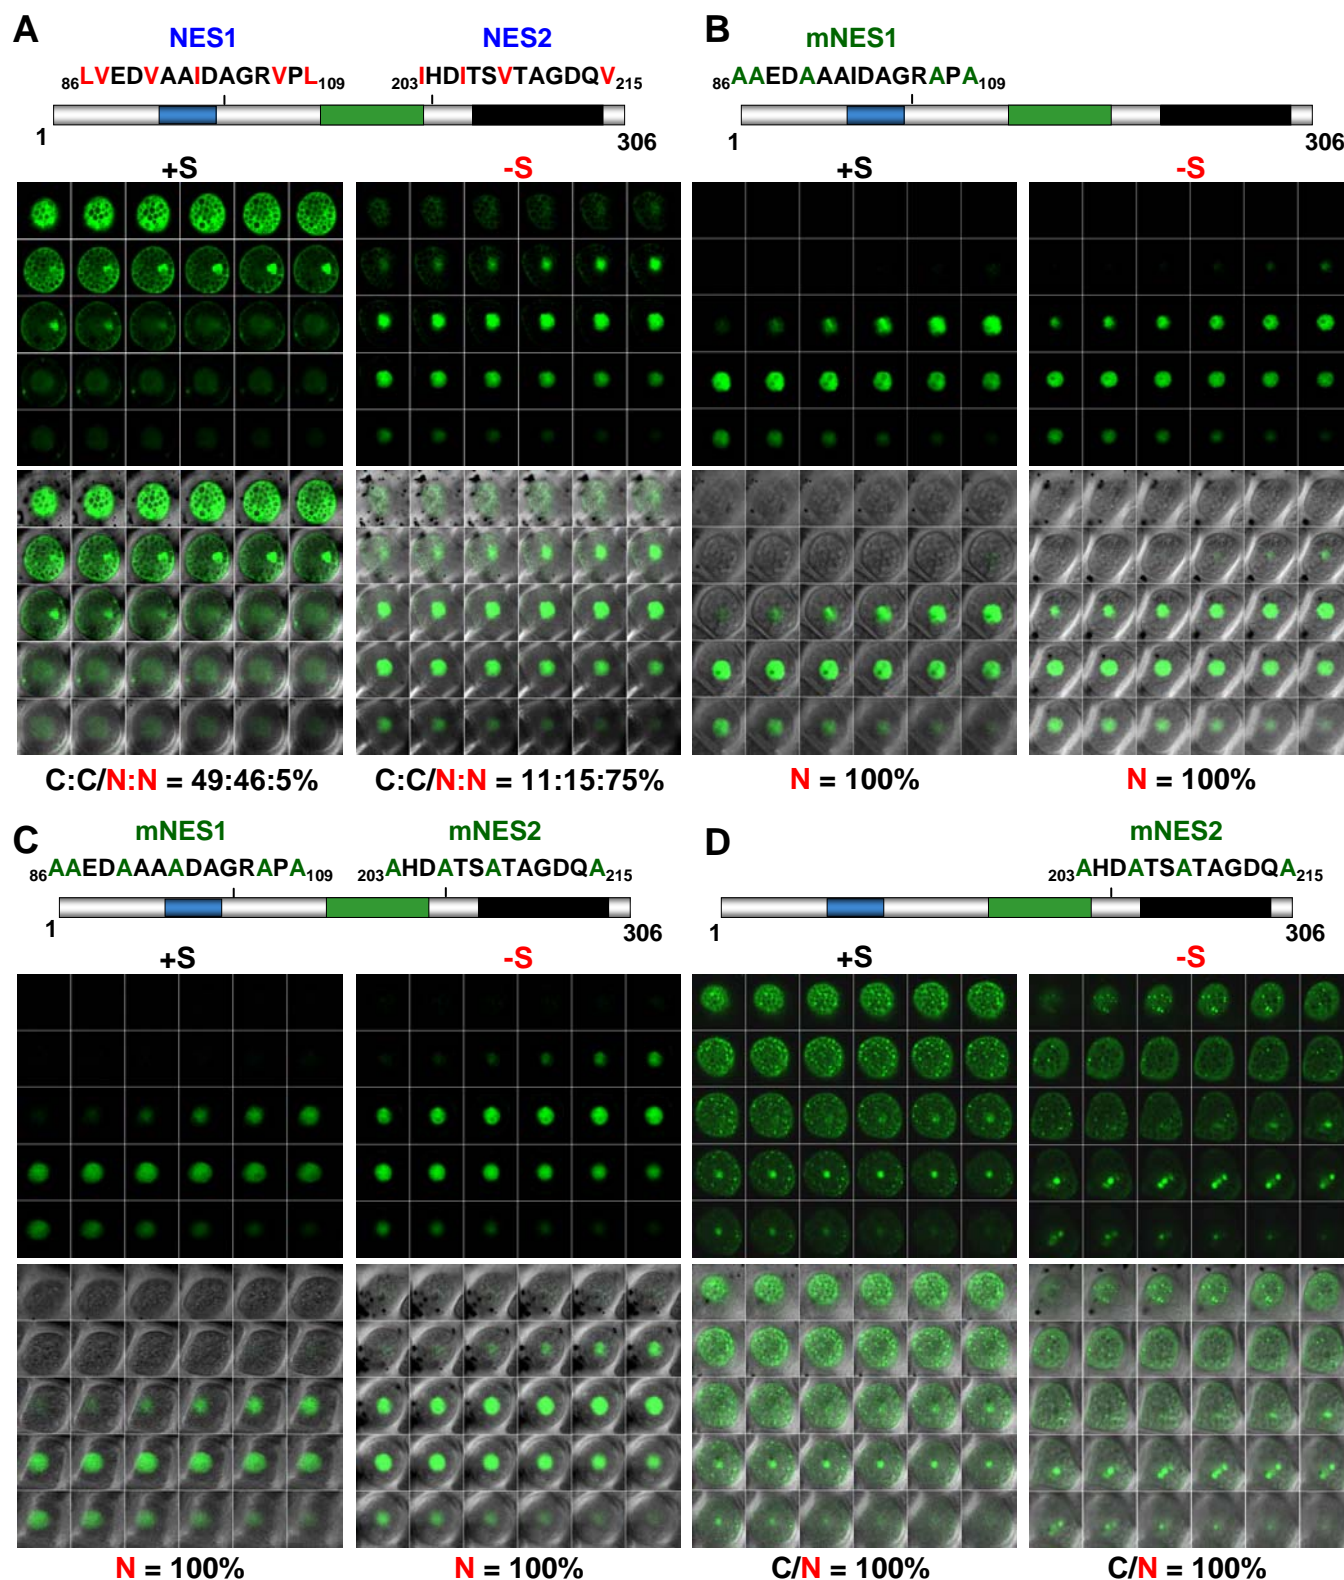

**Supplemental Figure 4.** NES1 Is a Major Nuclear Export Signal of OsMYBS1, Related to Figure 2C.

Barley aleurones were transfected with *Ubi:GFP-OsMYBS1* with (A) wild type NES, (B) mutations in NES1, (C) mutation in both NES1 and NES2, or (D) mutation in NES2, and incubated in +S or -S medium for 24 h. Percentage (%) = cells in the cytoplasm (C) or nucleus (N) per total cells expressing GFP examined. In (D), GFP-OsMYBS1 showed punctate pattern in nucleus and cytoplasm.

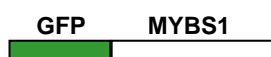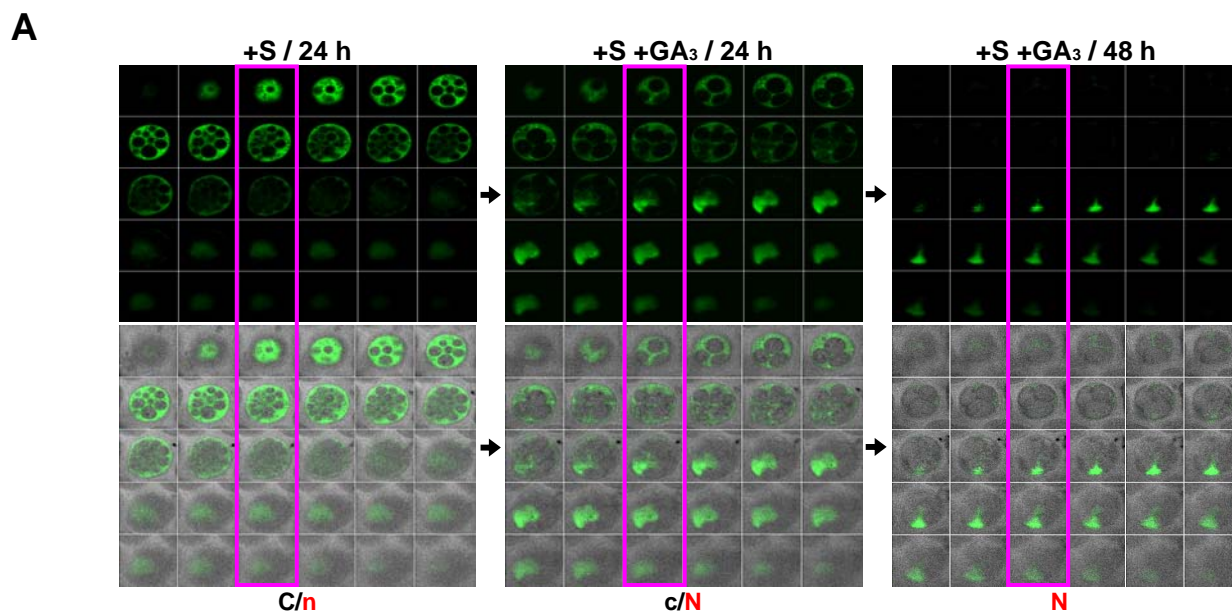

**B**      MYBGA transient overexpression  
in barley aleurones

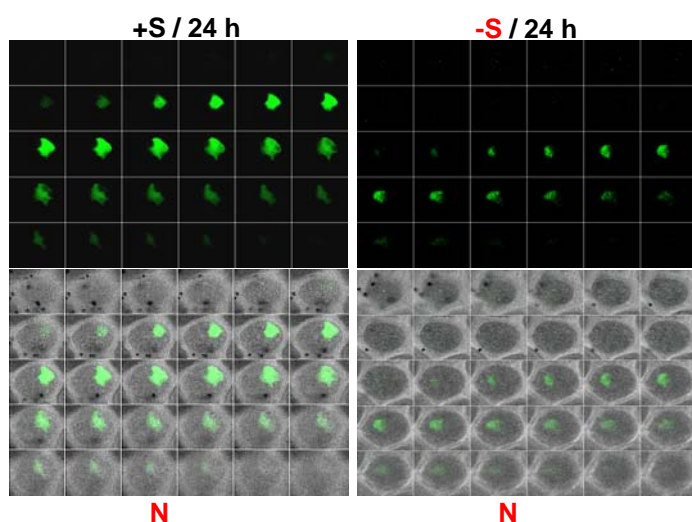

**C**      MYBGA stable overexpression  
in transgenic rice aleurones

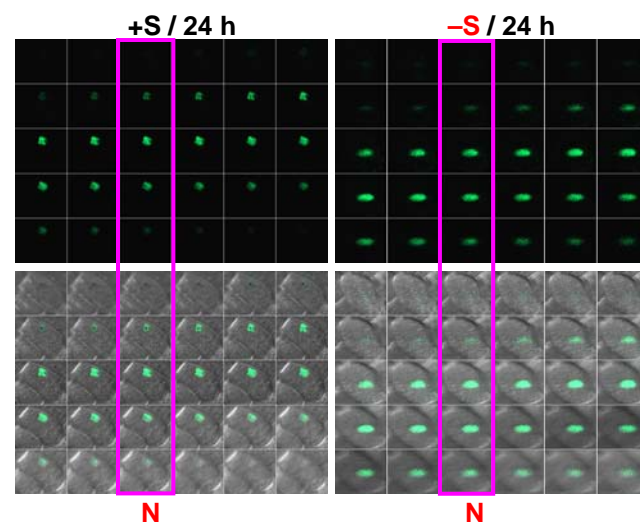

**D**      MYBGA deficient mutant (*gamyb-2*)

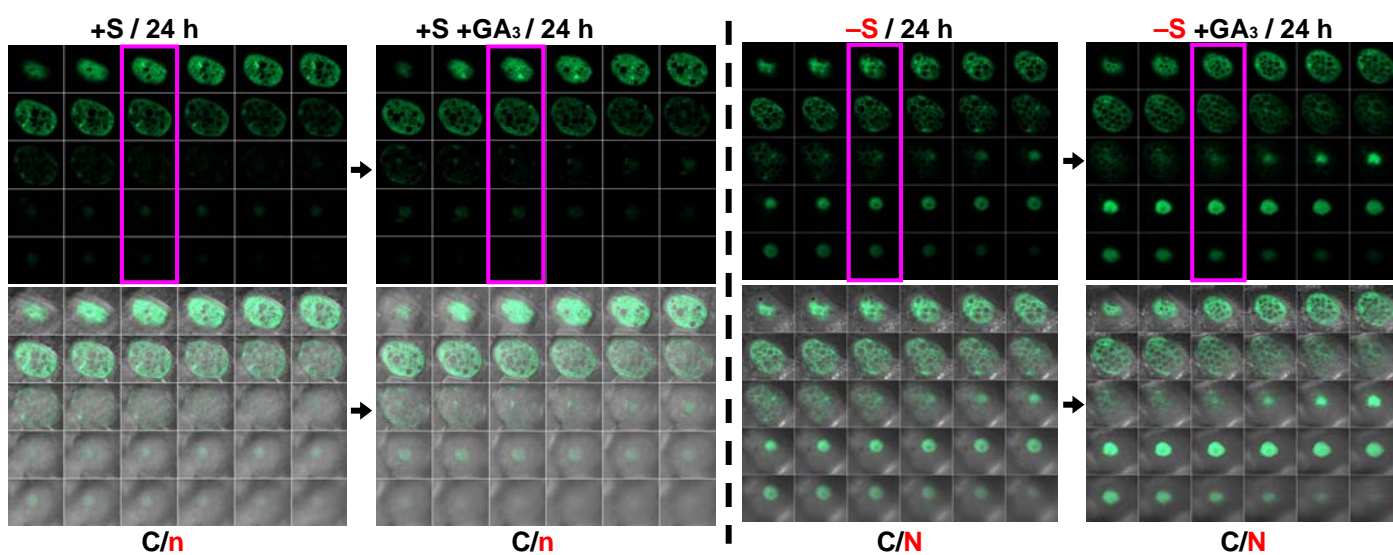

**Supplemental Figure 5.** GA<sub>3</sub> Promotes Nuclear Localization of MYBS1, and MYBGA Is Sufficient and Necessary for Promoting Nuclear Localization of MYBS1, Related to Figures 3A-C.

**(A)** GA<sub>3</sub> promotes nuclear localization of MYBS1 in the presence of glucose. Barley aleurones were transfected with *Ubi:GFP-OsMYBS1* and incubated in +S medium for 24 h. After addition of GA<sub>3</sub>, they were incubated for another 24 and 48 h. Vacuolation in GA<sub>3</sub>-treated aleurone cells was observed in bright field images. Boxes indicate images shown in Figure 3A.

**(B)** Transient overexpression of MYBGA promotes nuclear localization of MYBS1 in the presence of glucose. Barley aleurones were transfected with *Ubi:GFP-OsMYBS1* and *Ubi:OsMYBGA* and incubated in +S or –S medium for 24 h. Vacuolation in aleurone cells overexpressing MYBGA was observed in bright field images.

**(C)** Stable overexpression of MYBGA promotes nuclear localization of MYBS1 in the presence of glucose. Transgenic rice aleurones overexpressing OsMYBGA were transfected with *Ubi:GFP-OsMYBS1* and incubated in +S or –S medium for 24 h. Boxes indicate images shown in Figure 3B.

**(D)** MYBGA is necessary for promoting nuclear localization of MYBS1 in the presence of glucose. Aleurones of *gamyb-2* mutant rice seeds were transfected with *Ubi:GFP-OsMYBS1* and incubated in +S or –S medium for 24 h. After addition of GA<sub>3</sub>, they were incubated for another 24 h. Boxes indicate images shown in Figure 3C. The image of upper panel is a fluorescent field and the lower panel is a composite of fluorescent and bright fields. C and N indicate higher and c and n indicate lower GFP signals in the cytoplasm and nucleus, respectively.



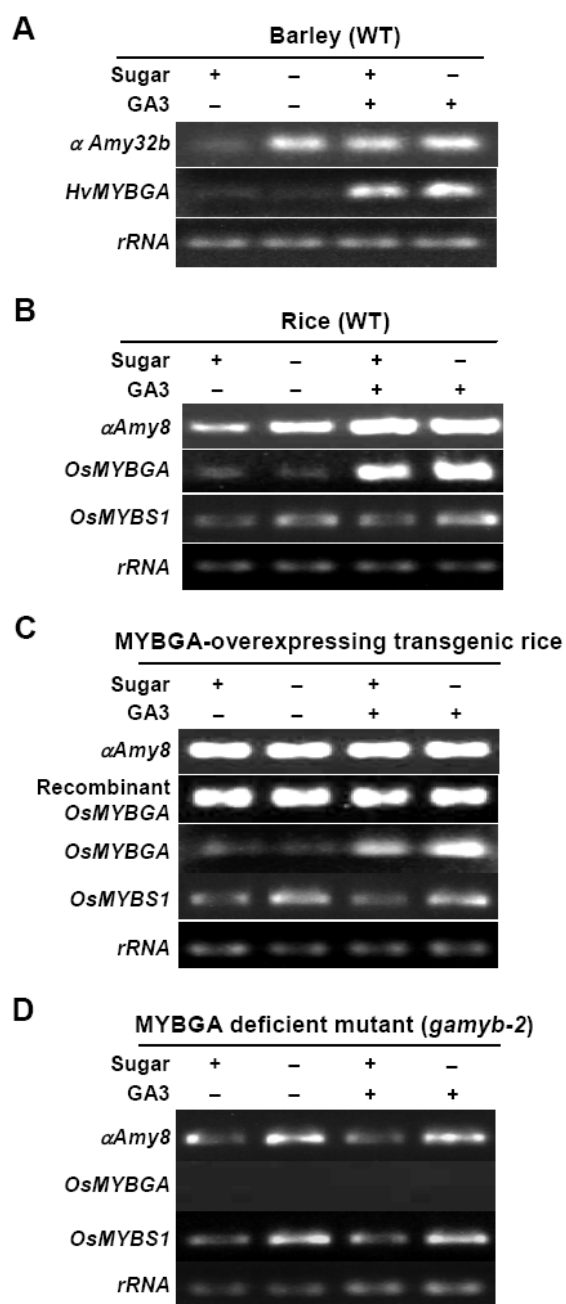

**Supplemental Figure 6.** GA and MYBGA Antagonize Sugar Repression of  $\alpha$ -Amylase Expression. Related to Figures 3D-F.

**(A)** Accumulation of  $\alpha$ Amy32b and HvMYBGA mRNA in barley aleurones. **(B)-(D)** Accumulation of  $\alpha$ Amy8, OsMYBGA, OsMYBS1 and mRNA in aleurones of wild-type rice, MYBGA overexpressing transgenic rice, and *gamyb-2* mutant rice, respectively. Barley or rice aleurone layers were incubated in +S or -S medium with or without GA3 for 24 h. Total RNA was purified and subjected to RT-PCR analysis.

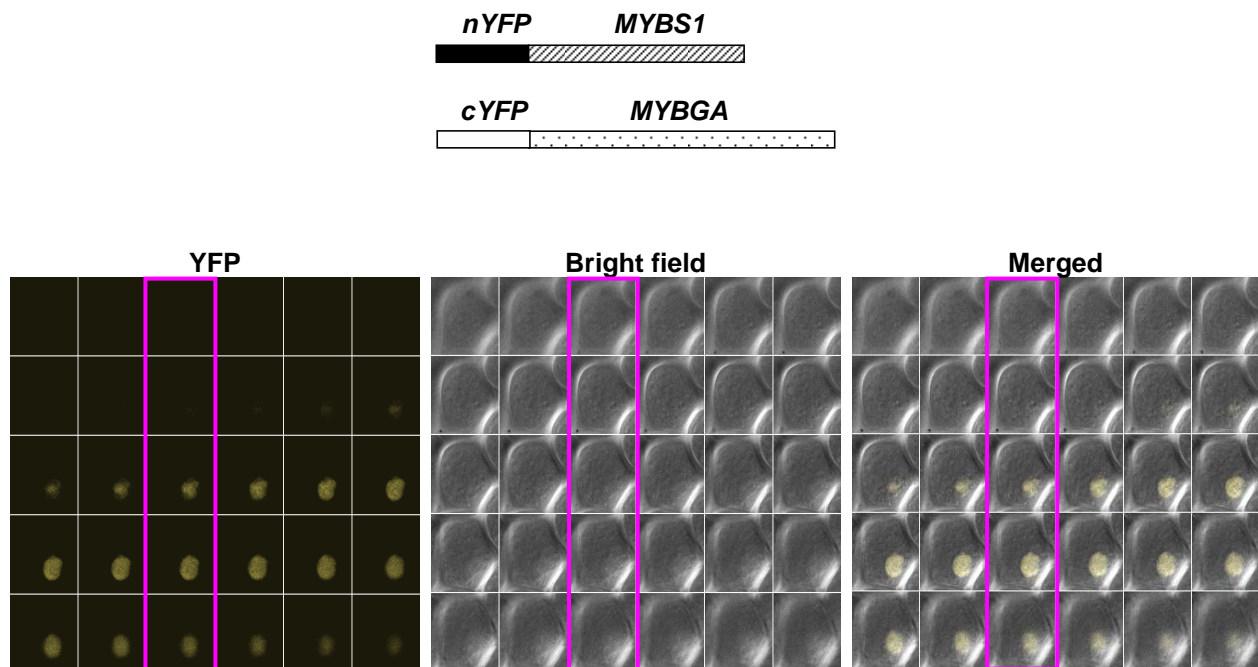

**Supplemental Figure 7.** BiFC Complementation Test Indicates MYBS1 and MYBGA Interact Physically, Related to Figure 4A.

Rice aleurones were co-transfected with *Ubi:nYFP-OsMYBS1* and *Ubi:cYFP-OsMYBGA*, and incubated in +S medium for 24 h. YFP was detected by a confocal microscopy. Boxes indicate images shown in Figure 4A

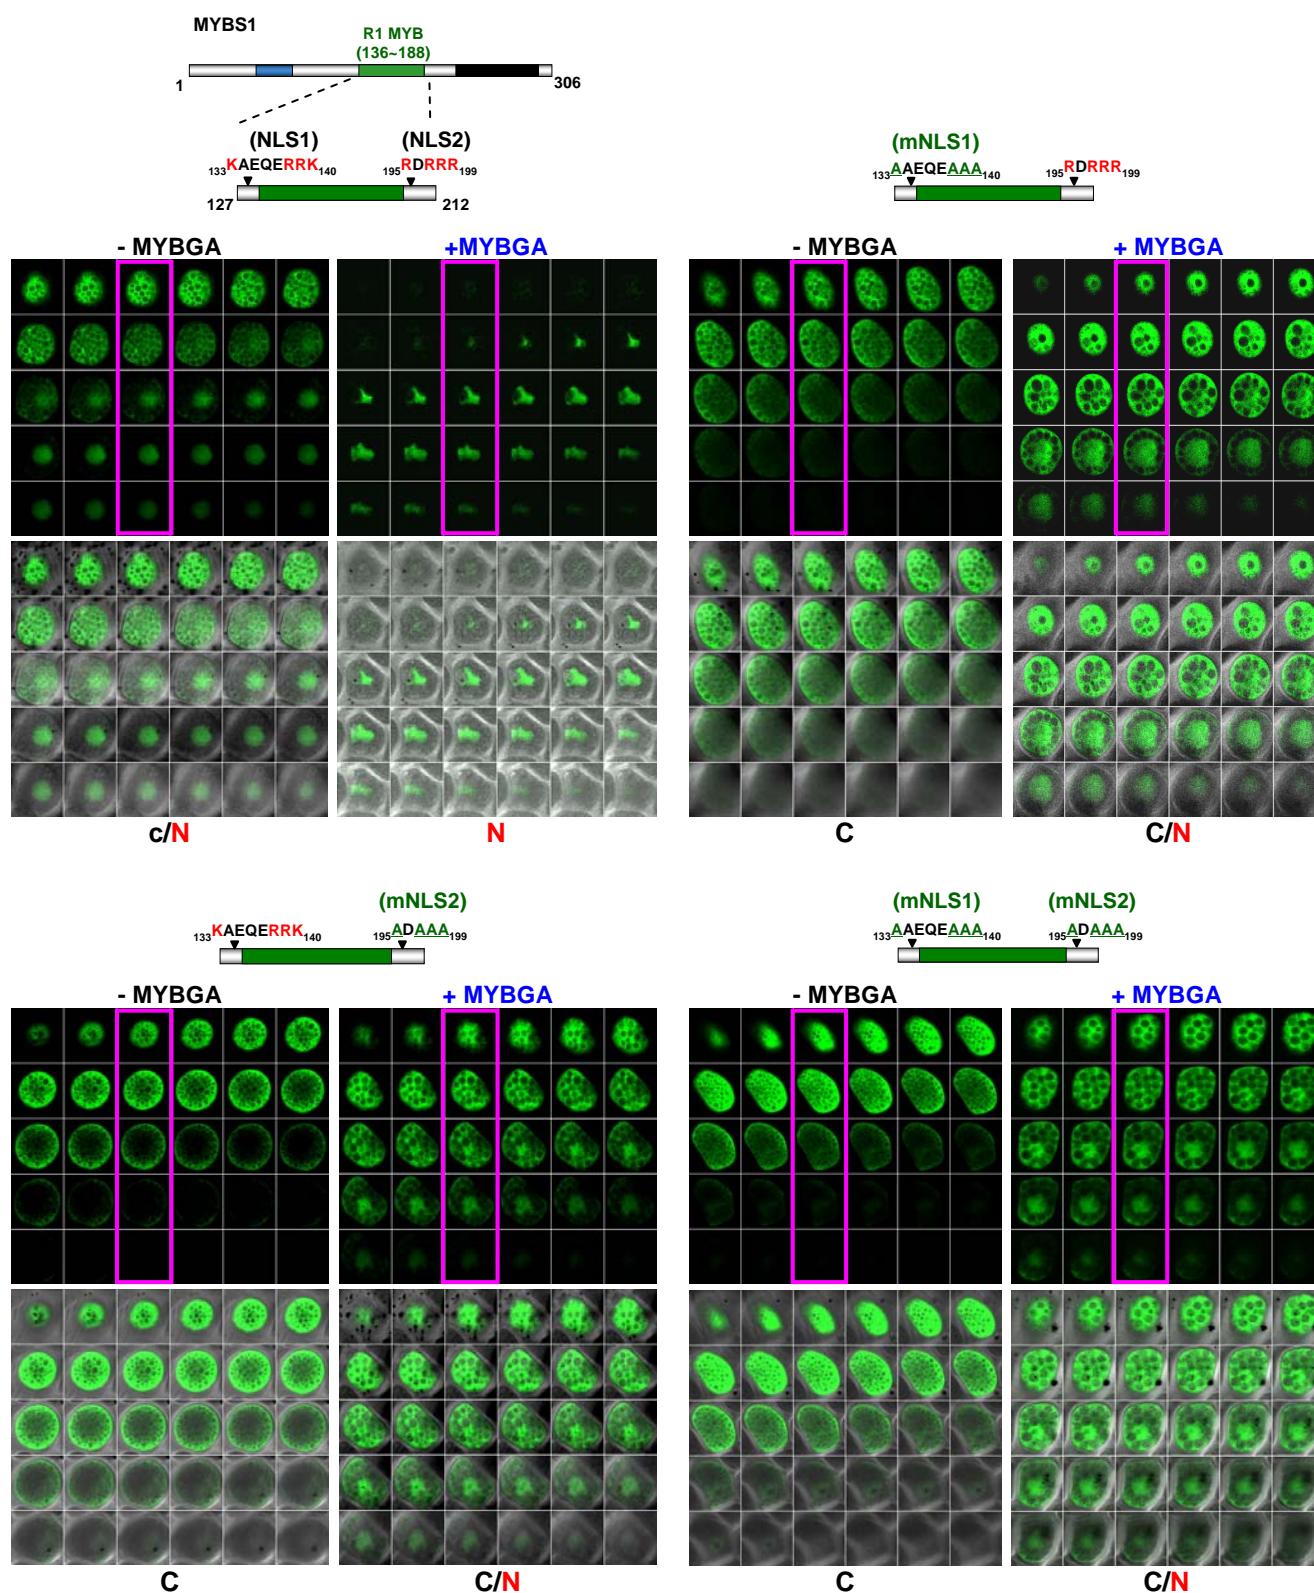

**Supplemental Figure 8.** MYBS1 and MYBGA Interact in the Cytoplasm Prior to Co-transport Into the Nucleus, Related to Figure 5A.

Barley aleurones were transfected with *Ubi:GFP-OsMYBS1* (wild-type or mutated in NLS1 and/or NLS2) and with or without *Ubi:OsMYBGA*, and incubated in -S medium for 48 h. Vacuolation was observed in the presence of MYBGA. Boxes indicate images shown in Figure 5A. C and N indicate higher and c and n indicate lower GFP signals in the cytoplasm and nucleus, respectively.

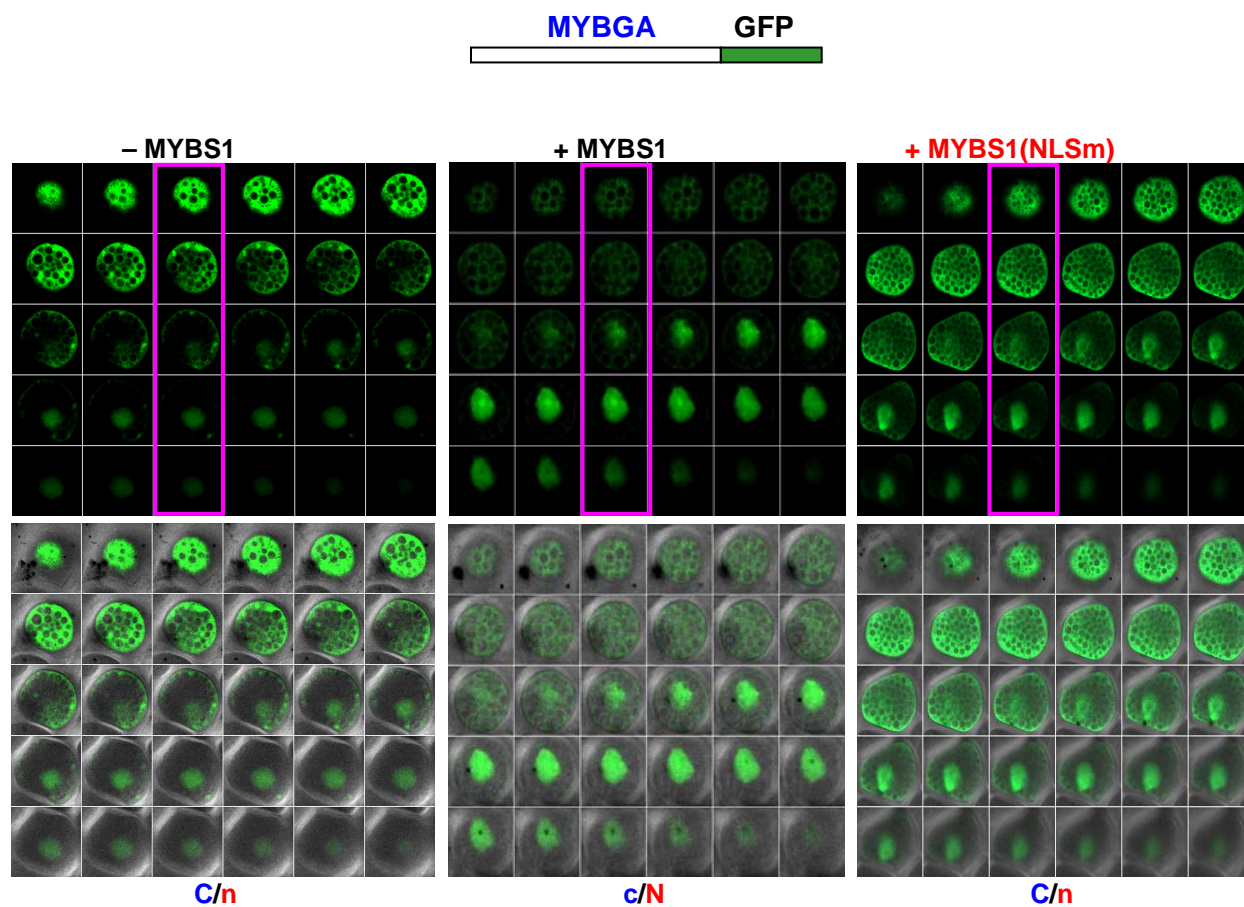

**Supplemental Figure 9.** Overexpression of MYBS1 Promotes Nuclear Localization of MYBGA, Related to Figure 5B

Barley aleurones were transfected with *Ubi:OsMYBS1* and *Ubi:OsMYBGA-GFP*, and incubated in +G medium for 24 h. The image of upper panel is a fluorescent field and the lower panel is a composite of fluorescent and bright fields. Boxes indicate images shown in Figure 5B.

| Glucose                                               |             | +                                                                                             | +                                                                                              | -                                                                                              | -                                                                                                |
|-------------------------------------------------------|-------------|-----------------------------------------------------------------------------------------------|------------------------------------------------------------------------------------------------|------------------------------------------------------------------------------------------------|--------------------------------------------------------------------------------------------------|
| OsMYBGA-GFP                                           |             | +                                                                                             | +                                                                                              | +                                                                                              | +                                                                                                |
| MYBS1                                                 |             | -                                                                                             | +                                                                                              | -                                                                                              | +                                                                                                |
| Number of cells with different locations of MYBGA-GFP | C > N (C/n) | 44 (76%)<br>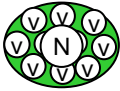 | 3 (7%)<br>    | 31 (67%)<br> | 0<br>         |
|                                                       | C = N (C/N) | 14 (24%)<br> | 9 (22%)<br>   | 15 (33%)<br> | 8 (20%)<br>   |
|                                                       | C < N (c/N) | 0<br>       | 21 (54%)<br> | 0<br>       | 28 (70%)<br> |
|                                                       | N           | 0<br>      | 7 (17%)<br> | 0<br>      | 4 (10%)<br> |
| Total cell no.                                        |             | 58                                                                                            | 41                                                                                             | 46                                                                                             | 32                                                                                               |

**Supplemental Figure 10.** The nuclear localization of MYBGA is enhanced by MYBS1

Barley aleurones were transfected with *Ubi:OsMYBGA-GFP* only or with *Ubi:OsMYBGA-GFP* plus *Ubi:OsMYBS1*, incubated in +sugar or -sugar medium for 24 h, and GFP signal was detected after 24 h. **N**: nucleus; C: cytoplasm; V: vacuole. C>N (C/n): signal higher in cytoplasm; C=N (C/N): signal similar between cytoplasm and nucleus; C<N (c/N): signal lower in cytoplasm. %: Percentage of number of cells with GFP distribution in the indicated category divided by total number of cells examined/



Figure S12 (Hong)

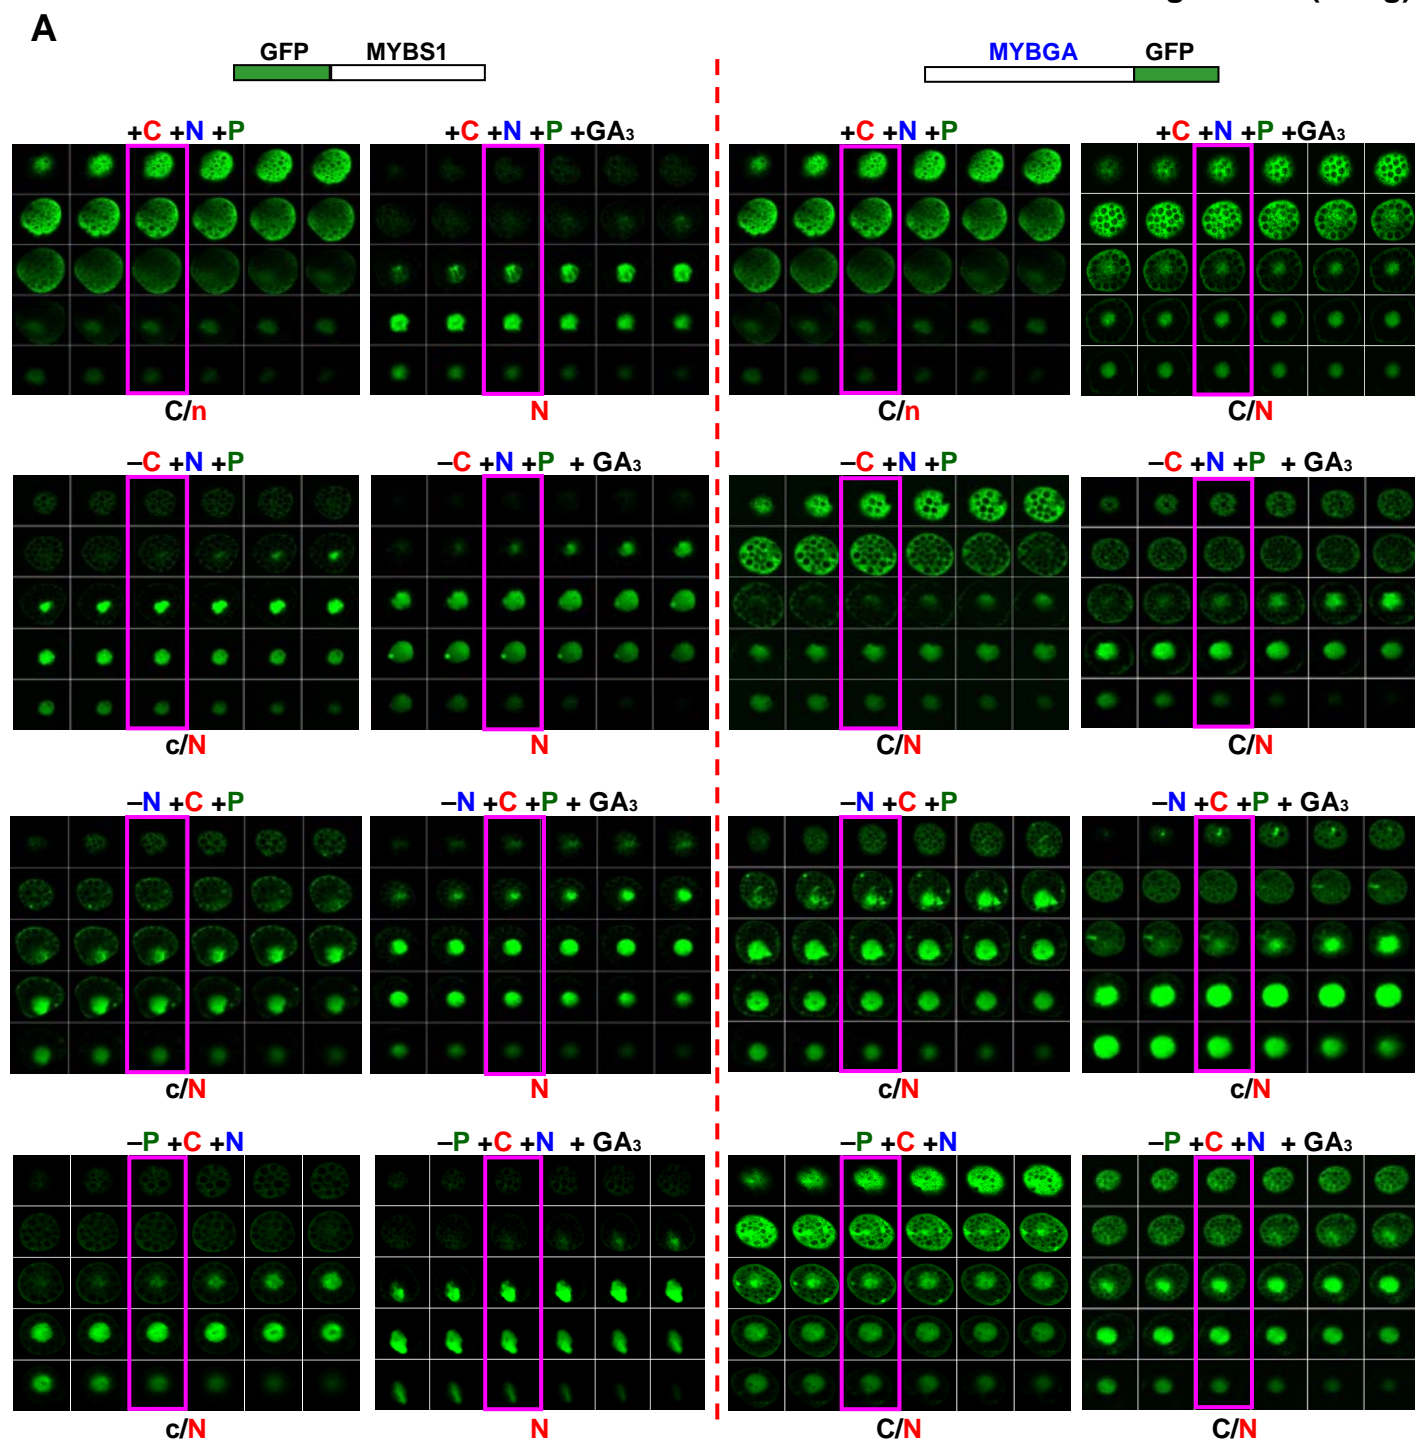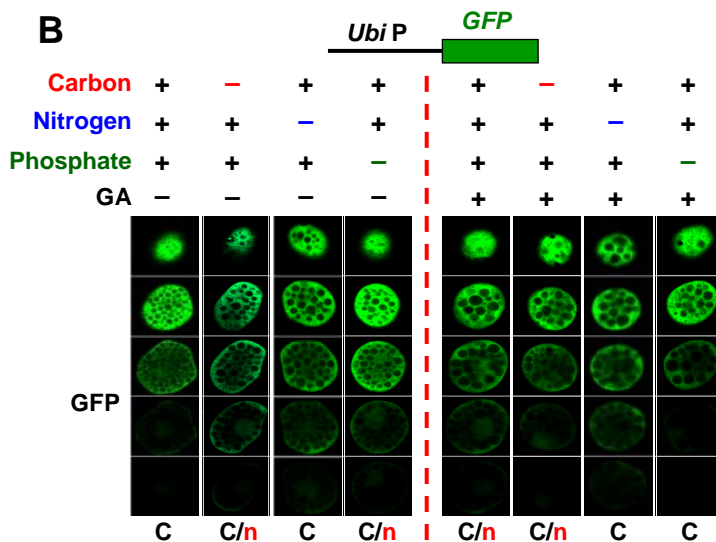

**Supplemental Figure 12.** C, N and P Starvation Promote the Nuclear Import of MYBS1 and MYBGA, Related to Figure 7B.

**(A)** Barley aleurones were transfected with *Ubi:GFP-OsMYBS1* (left panel) or *Ubi:OsMYBGA-GFP* (right panel). Boxes indicate images shown in Figure 7B.

**(B)** Barley aleurones were transfected with *Ubi:GFP*. Transfected aleurones were incubated in medium with or without glucose (C), nitrogen (N), or phosphate (P) in the absence or presence of GA<sub>3</sub> for 24 h. C and N indicate higher and c and n indicate lower GFP signals in the cytoplasm and nucleus, respectively.



**Supplemental Table 1. Primer list.**

| <b>Primer</b>           | <b>Nucleotide sequence (5'→3')</b>                                                |
|-------------------------|-----------------------------------------------------------------------------------|
| S1-1(F)                 | CACCATGACCTCCCAGGCGGCGACG                                                         |
| S159(F)                 | CACCATGAGGTCTGGCGGAGGAGGTGCGGA                                                    |
| S1-108(F)               | CACCATGTCCAAGGACGGCGGACAC                                                         |
| S1-127(F)               | CACCATGGGATATCGCAAGAGCTGCTCCAAG                                                   |
| S1-212(F)               | CACCATGGCCGGCGATCAGGTCGCCGCG                                                      |
| S1-112(R)               | ACAGGATCCGCCGTCTTGGAC                                                             |
| S1-212(R)               | TTACTAGCCGGCGGTGACGCTGGTGATGT                                                     |
| S1-306(R)               | CTATTGGTGATCTTGGCCGGTGGC                                                          |
| S1-127(F)-133m          | CACCATGGCGGCGAGAGCTGCTCCGAGGCGGAGCAGGAGGAGGAGGCCATCCCA<br>TGGACGGAGGAA            |
| S1-212R-196m            | GGTGACGCTGGTGATGTCGTGGATGCTGGATTCTTCTTCGTCTTCGTTTCATGGAGGTGAG                     |
| S1-141(F)               | GGGATCCCATGGACGGAGGAAGAGCACAGG                                                    |
| S1-145(R)-NLSm          | ATGGATCCCATTTTCTTCTCCTGCTCCGCATTGGAGCAGCTCTTGCCGCCGTCGTA                          |
| S1-191(F)-NLSm          | CTGAATTCCATGAACGAAGACGAAGAAGAATCCAGCATCCACGACATCA                                 |
| S1-193(R)               | CATGGAATTCAGGCGGATGAAGTACTTCTGCGCGT                                               |
| S1-NES1m-(F)            | GGCTGCAGACGCGGGCCGCGCTCCGGCTCCGCGCTACGCCGGGAGGAGTCCGCG                            |
| S1-NES1m-(R)            | GTCTGCAGCCGCGAGGTCCTCAGCAGCCGCCTCGTAGTGCCTCCGCACCTCCTCCGC                         |
| S1-NES2m-(F)            | GGCGATCAGGCGGCCGCGCAGCAGGGCGCCCGATCACCGG                                          |
| S1-NESm-(R)             | CTGCTGCGCGGCCGCTGATCGCCGGCGGTTGCGCTGGTTGCGTCGTGTGCGCTGGA<br>GCGGCGGCGGTGCGGTTTCAT |
| S1-1(F)- <i>KpnI</i>    | AAAGGTACCATGACCTCCCAGGCGGCGACG                                                    |
| GA-1(F)                 | CACCATGTATCGGGTGAAGAGCGAGA                                                        |
| GA-553(R)               | AGATCATTTGAATTCTGACATTTT                                                          |
| GA-1(F)- <i>KpnI</i>    | AAAGGTACCATGTATCGGGTGAAGAGCGAGA                                                   |
| YFP-342(R)- <i>KpnI</i> | AGAGGTACCGATAGATCTCTTGTACAGCTCGTCCAT                                              |
| YFP155(R)- <i>KpnI</i>  | CCAGGTACCGCCATGATATAGACGTTGTG                                                     |
| YFP-156(F)              | CACCATGGACAAGCAGAAGAACGGCATC                                                      |
| YFP-1(F)                | CACCATGGTGAGCAAGGGCGAGGAGCT                                                       |
| GFP-239(R)              | CCCCTTGTACAGCTCGTCCATGCC                                                          |
| GFP-1(F)                | TTAGCATGCATGGTGAGCAAGGGCGAGGAGCTGTT                                               |
| GBD(R)                  | GATATCTCACTTAGGAAATTCGCCCGGAATTA                                                  |
| GBD(F)                  | CACCATGAAGCTACTGTCTTCTA                                                           |
| GAD(F)                  | CACCATGGATAAAGCGGAATTAATTCC                                                       |
| GAD(R)                  | GATATCTCACTTAGGAAATTCGCCCGGAATTA                                                  |
| AK059511-Q5             | CAGCGACAAGATTTGGAACA                                                              |
| AK059511-Q3             | CAGGTAGCTCCTGCAATCGT                                                              |

|             |                             |
|-------------|-----------------------------|
| AK061988-Q5 | CTTTGGGGGCGGAAGTAA          |
| AK061988-Q3 | GGAGACTAGTTTAATACGACATGACAA |
| AK061237-Q5 | GCCATCAAGGCCTGCTAC          |
| AK061237-Q3 | CGATGAAGAAGCGGTTGG          |
| AK064300-Q5 | TCTTCCAGGGGTTAACTGG         |
| AK064300-Q3 | ATCTCCTCCACCTTCTCGTG        |
| AK069132-Q5 | CATCAATCTTGGCTTTACTGAGG     |
| AK069132-Q3 | AGAATTGCAGGCACAGCAG         |
| AK069691-Q5 | CGGCTCGATCATTCTCTTC         |
| AK069691-Q3 | ACGGATCATTGACTGTCCTGTA      |
| AK069697-Q5 | GCGATCGTCATGGAGTACG         |
| AK069697-Q3 | GCTGCTGGAAGAAGAAACGA        |
| AK070261-Q5 | CCAATTACGCTTCTGGAGGA        |
| AK070261-Q3 | GCGAAGTACACGATTTGCTTT       |
| AK072228-Q5 | CGTCTACGACGTCAAGAGCA        |
| AK072228-Q3 | CAAGTATCCATGCGGACCAT        |
| AF099203-Q5 | CCGCAAATCCCAGCTATAAAT       |
| AF099203-Q3 | TTGGAATTGGAGGGTGAGG         |
| AK100323-Q5 | CTTCTGGAGAGCCTTGCAGT        |
| AK100323-Q3 | CCAGCATTAGCAAGTTGGTTG       |
| AK106694-Q5 | GGTGCTGCAGGTGGAAAT          |
| AK106694-Q3 | CGAGAAGAGGCCGTAGTCC         |
| AK110902-Q5 | ACCACAGCCGAGTGATCC          |
| AK110902-Q3 | ATGCCGCTAGCACTTGATCT        |
| Lip2p-F     | CACCATCTTGATTATTCATATCCTA   |
| Lip2p-R     | AGGTAGCTCGTGTGGGTTGATGCG    |
| LIP1p-F     | CACCCAGGGGGTTCAACTCCGGGCT   |
| LIP1p-R     | CCACGAAAGAACAAAGCGTAACGCA   |
| PHO1-F      | CACCGCTCCATTGTCTCCAACCTGC   |
| PHO1-R      | ATGCCATTTCGTAGAACTGTTTGTG   |
| PHOSp-F     | CACCTCGATACACACATGGCACATG   |
| PHOSp-R     | GAGGAGAATGGGAGGCCGCGGG      |

**Supplemental Table 2. PCR pairs used for plasmid construction.**

| Forward primer | Reverse primer | Product (Plasmid)                                          |
|----------------|----------------|------------------------------------------------------------|
| <b>MYBS1</b>   |                |                                                            |
| S1-1(F)        | S1-112(R)      | MYBS1(1-112) [pUbi-GFP-MYBS1(1-112)-Nos]                   |
| S1-1(F)        | S1-212(R)      | MYBS1(1-212)[pUbi-GFP-MYBS1(1-212)-Nos]                    |
| S1-108(F)      | S1-212(R)      | MYBS1(108-212)[pUbi-GFP-MYBS1(108-212)-Nos]                |
| S1-108(F)      | S1-306(R)      | MYBS1(108-306)[pUbi-GFP-MYBS1(108-306)-Nos]                |
| S1-212(F)      | S1-306(R)      | MYBS1(212-306)[pUbi-GFP-MYBS1(212-306)-Nos]                |
| S1-127(F)      | S1-212(R)      | MYBS1(127-212)[pUbi-GFP-MYBS1(127-212)-Nos]                |
| S1-127(F)-133m | S1-212(R)      | MYBS1(127-212)(mNLS1)[pUbi-GFP-MYBS1(127-212)(mNLS1)-Nos]  |
| S1-127(F)      | S1-212(R)-196m | MYBS1(127-212)(mNLS2)[pUbi-GFP- MYBS1(127-212)(mNLS2)-Nos] |
| S1-127(F)-133m | S1-212R-196m   | MYBS1(127-212)(mNLS1,2)[pUbi-GFP-(127-212)(mNLS1,2)-Nos]   |
| S1-1 (F)       | S1-145(R)-NLSm | MYBS1 (mNLS1)[pUbi-GFP-MYBS1 (mNLS1)-Nos]                  |
| S1-141(F)      | S1-306(R)      |                                                            |
| S1-1 (F)       | S1-193(R)      | MYBS1 (mNLS2)[pUbi-GFP-MYBS1 (mNLS2)-No2]                  |
| S1-191F-NLS2m  | S1-306(R)      |                                                            |
| S1-1 (F)       | S1-145(R)-NLSm | MYBS1 (m NLS1,2)[pUbi-GFP-MYBS1 (mNLS1,2)-Nos]             |
| S1-141F        | S1-306(R)      | Using pUbi-GFP-MYBS1 (mNLS2)-Nos as tamplate               |
| S1-1 (F)       | S1-145(R)-NLSm | MYBS1 (m NLS1)[pUbi- MYBS1 (m NLS1)-Nos]                   |
| S1-141(F)      | S1-306(R)      |                                                            |
| S1-1 (F)       | S1-193(R)      | MYBS1 (m NLS2)[pUbi- MYBS1 (m NLS2)-Nos]                   |
| S1-191F-NLS2m  | S1-306(R)      |                                                            |
| S1-1 (F)       | S1-145(R)-NLSm | MYBS1 (mNLS1,2)[pUbi-MYBS1 (mNLS1,2)-Nos]                  |
| S1-141F        | S1-306(R)      | Using pUbi-MYBS1 (m NLS2)-Nos as tamplate                  |
| S1-59(F)       | S1-306(R)      | MYBS1(59-306)[pUbi-GFP-MYBS1(59-306)-Nos]                  |
| S1-1 (F)       | S1-NES1m(R)    | MYBS1 (m NES1)[pUbi-GFP-MYBS1 (m NES1)-Nos]                |
| S1-NES1m(F)    | S1-306(R)      |                                                            |
| S1-1 (F)       | S1-NES2m(R)    | MYBS1 (m NES2)[pUbi-GFP-MYBS1 (m NES2)-Nos]                |
| S1-NES2m(F)    | S1-306(R)      |                                                            |
| S1-1 (F)       | S1-NES2m(R)    | MYBS1 (m NES1, 2)[pUbi-GFP-MYBS1 (m NES1, 2)-Nos]          |
| S1-NES2m(F)    | S1-306(R)      |                                                            |
| <b>MYBGA</b>   |                |                                                            |
| GA-1(F)        | OsGA553(R)+S   | MYBGA (pUbi-GAD-MYBGA-Nos)                                 |
| GA-1(F)        | OsGA553(R)+S   | MYBGA (pUbi-GFP-MYBGA-Nos)                                 |

**BiFC**

|                       |                            |                                  |
|-----------------------|----------------------------|----------------------------------|
| YFP-1(F)              | YFP155(R)-xS- <i>KpnI</i>  | nYFP-MYBS1 (pUbi-nGFP-MYBS1-Nos) |
| S1-1(F)- <i>KpnI</i>  | S1-306 (R)                 |                                  |
| YFP-156 F)            | YFP342 (R)-xS- <i>KpnI</i> | cYFP-MYBS1 (pUbi-cGFP-MYBGA-Nos) |
| GA-1 (F)- <i>KpnI</i> | OsGA553(R)+S               |                                  |

**Promoter assay**

|          |          |                               |
|----------|----------|-------------------------------|
| Lip2p-GF | Lip2p-R  | pLIP2 (pLip2-Luc-Nos)         |
| PHOSp-GF | PHOSp-GF | pPhospho1 (pPhospho1-Luc-Nos) |
| LIP1p-GF | LIP1p-R  | pLIP1 (pLip1-Luc-Nos)         |
| PHO1-GF  | PHO1-R   | pPHO1 (pPHO1-Luc-Nos)         |

**Quantitative RT-PCR**

|             |             |                                                   |
|-------------|-------------|---------------------------------------------------|
| AK059511-Q5 | AK059511-Q3 | Lip2: GDSL-motif lipase                           |
| AK061237-Q5 | AK061237-Q3 | Phospho1: Phosphatase-like                        |
| AK061988-Q5 | AK061988-Q3 | UBQ                                               |
| AK064300-Q5 | AK064300-Q3 | $\alpha$ Amy8/Ramy3E                              |
| AK069132-Q5 | AK69132-Q3  | ST: Sugar transporter family protein              |
| AK069691-Q5 | AK069691-Q3 | NAP2: Nepenthesin-1 aspartic protease precursor 2 |
| AK069697-Q5 | AK069697-Q3 | SAPK9: Serine/threonine protein kinase            |
| AK070261-Q5 | AK070261-Q3 | Lip1: GDSL-motif lipase                           |
| AK072228-Q5 | AK072228-Q3 | NAP1: Nepenthesin-1 aspartic protease precursor 1 |
| AF099203-Q5 | AF099203-Q3 | EP3A: Cysteine protease                           |
| AK100323-Q5 | AK100323-Q3 | PHO1: phosphate transporter                       |
| AK106694-Q5 | AK106694-Q3 | PT1: <i>Zea mays</i> phosphate transport protein  |
| AK110902-Q5 | AK110902-Q3 | GLN: Putative $\beta$ -1,3-glucanase              |

**Supplemental Table 3. Quantitative analysis of  $\alpha$ Amy8, MYBGA, and OsMYBS1 mRNA levels in aleurones of wild-type rice, MYBGA overexpressing transgenic rice, and MYBGA deficient mutant rice.**

| Sugar                                          | +                                            | –                                            | +                                            | –                                            |
|------------------------------------------------|----------------------------------------------|----------------------------------------------|----------------------------------------------|----------------------------------------------|
| GA <sub>3</sub>                                | –                                            | –                                            | +                                            | +                                            |
| <b>WT</b>                                      |                                              |                                              |                                              |                                              |
| <i><math>\alpha</math>Amy8</i>                 | 8.13*10 <sup>-3</sup> ±1.71*10 <sup>-3</sup> | 1.06±7.87*10 <sup>-2</sup>                   | 27.30±1.20                                   | 26.78±1.91                                   |
| <i>OsMYBGA</i>                                 | 4.25*10 <sup>-2</sup> ±2.24*10 <sup>-3</sup> | 1.03*10 <sup>-1</sup> ±2.15*10 <sup>-2</sup> | 1.79*10 <sup>-1</sup> ±2.08*10 <sup>-2</sup> | 1.84*10 <sup>-1</sup> ±1.15*10 <sup>-4</sup> |
| <i>OsMYBS1</i>                                 | 2.48*10 <sup>-2</sup> ±2.30*10 <sup>-3</sup> | 3.57*10 <sup>-2</sup> ±1.11*10 <sup>-3</sup> | 2.67*10 <sup>-2</sup> ±5.83*10 <sup>-3</sup> | 3.71*10 <sup>-2</sup> ±3.79*10 <sup>-3</sup> |
| <b>MYBGA-overexpressing transgenic rice</b>    |                                              |                                              |                                              |                                              |
| <i><math>\alpha</math>Amy8</i>                 | 89.26±2.82                                   | 86.79±2.85                                   | 91.02±7.70                                   | 99.11±7.94                                   |
| <i>OsMYBGA</i>                                 | 4.05*10 <sup>-1</sup> ±7.58*10 <sup>-3</sup> | 4.38*10 <sup>-1</sup> ±3.15*10 <sup>-2</sup> | 3.94*10 <sup>-1</sup> ±3.18*10 <sup>-2</sup> | 3.78*10 <sup>-1</sup> ±3.89*10 <sup>-2</sup> |
| <i>OsMYBS1</i>                                 | 2.93*10 <sup>-2</sup> ±2.40*10 <sup>-3</sup> | 4.25*10 <sup>-2</sup> ±1.95*10 <sup>-3</sup> | 2.78*10 <sup>-2</sup> ±3.54*10 <sup>-3</sup> | 4.37*10 <sup>-2</sup> ±1.62*10 <sup>-3</sup> |
| <b>MYBGA deficient mutant (<i>gamyb-2</i>)</b> |                                              |                                              |                                              |                                              |
| <i><math>\alpha</math>Amy8</i>                 | 4.13*10 <sup>-4</sup> ±4.32*10 <sup>-5</sup> | 2.78*10 <sup>-2</sup> ±3.07*10 <sup>-5</sup> | 3.74*10 <sup>-4</sup> ±2.96*10 <sup>-5</sup> | 2.05*10 <sup>-2</sup> ±3.38*10 <sup>-3</sup> |
| <i>OsMYBGA</i>                                 | ND                                           | ND                                           | ND                                           | ND                                           |
| <i>OsMYBS1</i>                                 | 5.52*10 <sup>-3</sup> ±8.17*10 <sup>-4</sup> | 1.19*10 <sup>-2</sup> ±2.20*10 <sup>-3</sup> | 4.48*10 <sup>-3</sup> ±1.02*10 <sup>-3</sup> | 1.02*10 <sup>-2</sup> ±1.98*10 <sup>-3</sup> |
